# Supplementary material for: Land Use/Land Cover Mapping Based on GEE for the Monitoring of Changes in Ecosystem Types in the Upper Yellow River Basin over the Tibetan Plateau
Source: MDPI journal article supplement (doi:10.3390/rs14215361), 2022-10-26
Supplement: s1 [file s1]

# Land Use/Land Cover Mapping Based on GEE for the Monitoring of Changes in Ecosystem Types in the Upper Yellow River Basin over the Tibetan Plateau

Senyao Feng <sup>1</sup>, Wenlong Li <sup>1,\*</sup>, Jing Xu <sup>2</sup>, Tiangang Liang <sup>1</sup>, Xuanlong Ma <sup>3,4</sup>, Wenying Wang <sup>5</sup> and Hongyan Yu <sup>6</sup>

<sup>1</sup> State Key Laboratory of Herbage Improvement and Grassland Agro-Ecosystems, College of Pastoral Agriculture Science and Technology, Lanzhou University, Lanzhou 730000, China

<sup>2</sup> School of Agriculture and Forestry Economic and Management, Lanzhou University of Finance and Economics, Lanzhou 730020, China

<sup>3</sup> College of Earth and Environmental Sciences, Lanzhou University, Lanzhou 730020, China

<sup>4</sup> Institute of Yellow River Basin Green Development, Lanzhou University, Lanzhou 730020, China

<sup>5</sup> Department of Life Sciences, Qinghai Normal University, Xining 810008, China

<sup>6</sup> Service Guarantee Center of Qilian Mountain National Park in Qinghai, Xining 810008, China

\* Correspondence: wllee@lzu.edu.cn; Tel.: +86-136-5945-1811

Contents of this file:

**Table S1 to S9**

**Figure S1 to S4**

**Table S1.** Relationships of changes in ecosystem types.

| 2018 Ecosystem Types | 2020 Ecosystem Types | Ecosystem Types Change |
|----------------------|----------------------|------------------------|
|----------------------|----------------------|------------------------|

|                      |                      |                                           |
|----------------------|----------------------|-------------------------------------------|
| Barren Ecosystem     | Grassland Ecosystem  | progressive succession direction change   |
| Barren Ecosystem     | Wetland Ecosystem    | progressive succession direction change   |
| Barren Ecosystem     | Shrubland Ecosystem  | progressive succession direction change   |
| Barren Ecosystem     | Forest Ecosystem     | progressive succession direction change   |
| Freshwater Ecosystem | Grassland Ecosystem  | progressive succession direction change   |
| Freshwater Ecosystem | Wetland Ecosystem    | progressive succession direction change   |
| Grassland Ecosystem  | Shrubland Ecosystem  | progressive succession direction change   |
| Grassland Ecosystem  | Forest Ecosystem     | progressive succession direction change   |
| Wetland Ecosystem    | Shrubland Ecosystem  | progressive succession direction change   |
| Shrubland Ecosystem  | Forest Ecosystem     | progressive succession direction change   |
| Grassland Ecosystem  | Barren Ecosystem     | retrogressive succession direction change |
| Wetland Ecosystem    | Barren Ecosystem     | retrogressive succession direction change |
| Forest Ecosystem     | Barren Ecosystem     | retrogressive succession direction change |
| Forest Ecosystem     | Grassland Ecosystem  | retrogressive succession direction change |
| Grassland Ecosystem  | Freshwater Ecosystem | retrogressive succession direction change |
| Wetland Ecosystem    | Freshwater Ecosystem | retrogressive succession direction change |
| Shrubland Ecosystem  | Grassland Ecosystem  | retrogressive succession direction change |
| Shrubland Ecosystem  | Wetland Ecosystem    | retrogressive succession direction change |
| Forest Ecosystem     | Shrubland Ecosystem  | retrogressive succession direction change |
| Shrubland Ecosystem  | Barren Ecosystem     | retrogressive succession direction change |

**Table S2.** The accuracies with different feature combinations in 2018 and 2020.

| Feature Combinations |       | Spectral Bands | Spectral Bands + Spectral Indices | Spectral Bands + Spectral Indices + Terrain Features | Spectral Bands + Spectral Indices + Terrain Features + Texture Features |
|----------------------|-------|----------------|-----------------------------------|------------------------------------------------------|-------------------------------------------------------------------------|
| 2018                 | OA    | 80.13%         | 81.88%                            | 86.36%                                               | 87.45%                                                                  |
|                      | Kappa | 0.776          | 0.7885                            | 0.8404                                               | 0.8551                                                                  |
| 2020                 | OA    | 84.80%         | 85.01%                            | 90.86%                                               | 92.14%                                                                  |
|                      | Kappa | 0.8202         | 0.8228                            | 0.8939                                               | 0.9082                                                                  |

**Table S3.** Confusion matrix of LULC first-degree classes accuracy assessment in 2018. The overall accuracy is 90.58% and the Kappa coefficient is 0.88. UA denotes user's accuracy, PA denotes producer's accuracy.

| 2018 Prediction    |                        |        |           |           |                        |                   |                   |        |              |       |        |
|--------------------|------------------------|--------|-----------|-----------|------------------------|-------------------|-------------------|--------|--------------|-------|--------|
| First-Degree Class |                        | Forest | Shrubland | Grassland | Wetland and Water body | Agricultural land | Construction land | Barren | Snow and ice | Total | PA     |
| 2018 Reference     | Forest                 | 207    | 6         | 3         | 0                      | 10                | 0                 | 0      | 0            | 226   | 0.9159 |
|                    | Shrubland              | 6      | 70        | 11        | 0                      | 4                 | 0                 | 2      | 0            | 93    | 0.7527 |
|                    | Grassland              | 11     | 8         | 669       | 5                      | 14                | 13                | 7      | 0            | 727   | 0.9202 |
|                    | Wetland and Water body | 1      | 0         | 9         | 503                    | 0                 | 11                | 0      | 0            | 524   | 0.9599 |
|                    | Agricultural land      | 12     | 1         | 19        | 1                      | 378               | 9                 | 0      | 0            | 420   | 0.9    |
|                    | Construction land      | 0      | 1         | 24        | 4                      | 19                | 229               | 3      | 0            | 280   | 0.8179 |
|                    | Barren                 | 0      | 0         | 4         | 2                      | 0                 | 4                 | 134    | 7            | 151   | 0.8874 |
|                    | Snow and ice           | 0      | 0         | 0         | 0                      | 0                 | 0                 | 6      | 90           | 96    | 0.9375 |
| Total              |                        | 237    | 86        | 739       | 515                    | 425               | 266               | 152    | 97           | 2517  |        |
| UA                 |                        | 0.8734 | 0.8139    | 0.9053    | 0.9767                 | 0.8894            | 0.8609            | 0.8816 | 0.9278       |       |        |
| OA                 |                        | 0.9058 |           |           |                        |                   |                   |        |              |       |        |
| Kappa              |                        | 0.8849 |           |           |                        |                   |                   |        |              |       |        |

**Table S4.** Confusion matrix of LULC first-degree classes accuracy assessment in 2020. The overall accuracy is 93.02% and the Kappa coefficient is 0.91. UA denotes user's accuracy, PA denotes producer's accuracy.

| 2020 Prediction    |                        |        |           |           |                        |                   |                   |        |              |       |        |
|--------------------|------------------------|--------|-----------|-----------|------------------------|-------------------|-------------------|--------|--------------|-------|--------|
| First-Degree Class |                        | Forest | Shrubland | Grassland | Wetland and Water body | Agricultural land | Construction land | Barren | Snow and ice | Total | PA     |
| 2020<br>Reference  | Forest                 | 215    | 1         | 0         | 0                      | 8                 | 1                 | 0      | 0            | 225   | 0.9556 |
|                    | Shrubland              | 3      | 64        | 7         | 0                      | 1                 | 0                 | 0      | 0            | 75    | 0.8533 |
|                    | Grassland              | 3      | 9         | 631       | 7                      | 10                | 14                | 7      | 0            | 681   | 0.9266 |
|                    | Wetland and Water body | 0      | 0         | 9         | 510                    | 0                 | 4                 | 1      | 0            | 524   | 0.9733 |
|                    | Agricultural land      | 8      | 0         | 15        | 1                      | 365               | 3                 | 0      | 0            | 392   | 0.9311 |
|                    | Construction land      | 0      | 0         | 16        | 3                      | 13                | 245               | 2      | 3            | 282   | 0.8688 |
|                    | Barren                 | 0      | 0         | 1         | 0                      | 0                 | 3                 | 134    | 0            | 138   | 0.971  |
|                    | Snow and ice           | 3      | 0         | 2         | 0                      | 0                 | 0                 | 7      | 36           | 48    | 0.75   |
| Total              |                        | 232    | 74        | 681       | 521                    | 397               | 270               | 151    | 39           | 2365  |        |
| UA                 |                        | 0.9267 | 0.8649    | 0.9266    | 0.9788                 | 0.9194            | 0.9074            | 0.8874 | 0.9231       |       |        |
| OA                 |                        | 0.9302 |           |           |                        |                   |                   |        |              |       |        |
| Kappa              |                        | 0.9141 |           |           |                        |                   |                   |        |              |       |        |



**Table S5.** Confusion matrix of LULC second-degree classes accuracy assessment in 2018. The overall accuracy is 87.45% and the Kappa coefficient is 0.85. UA denotes user's accuracy, PA denotes producer's accuracy.

|                     |       | 2018 Prediction |        |      |        |        |        |        |        |        |        |      |        |        |        |        |        |        |        |       |        |
|---------------------|-------|-----------------|--------|------|--------|--------|--------|--------|--------|--------|--------|------|--------|--------|--------|--------|--------|--------|--------|-------|--------|
| Second-Degree Class |       | BLF             | NLF    | MF   | BLS    | NLS    | Grass  | Marsh  | Lake   | River  | Crop   | OL   | Urban  | UGS    | IAT    | DL     | BS     | BR     | Snow   | Total | PA     |
| 2018 Reference      | BLF   | 74              | 0      | 5    | 1      | 0      | 0      | 0      | 0      | 0      | 2      | 1    | 0      | 0      | 0      | 0      | 0      | 0      | 0      | 83    | 0.8916 |
|                     | NLF   | 0               | 33     | 7    | 0      | 0      | 1      | 0      | 0      | 0      | 0      | 0    | 0      | 0      | 0      | 0      | 0      | 0      | 0      | 41    | 0.8049 |
|                     | MF    | 5               | 7      | 81   | 5      | 0      | 3      | 1      | 0      | 0      | 0      | 0    | 0      | 0      | 0      | 0      | 0      | 0      | 0      | 102   | 0.7941 |
|                     | BLS   | 3               | 0      | 2    | 52     | 1      | 7      | 0      | 0      | 0      | 0      | 0    | 0      | 0      | 0      | 0      | 0      | 0      | 0      | 65    | 0.8    |
|                     | NLS   | 0               | 0      | 0    | 2      | 25     | 0      | 0      | 0      | 0      | 0      | 1    | 0      | 0      | 0      | 0      | 0      | 0      | 0      | 28    | 0.8929 |
|                     | Grass | 1               | 0      | 1    | 2      | 2      | 655    | 2      | 2      | 21     | 18     | 4    | 10     | 0      | 5      | 1      | 0      | 1      | 2      | 727   | 0.901  |
|                     | Marsh | 0               | 0      | 1    | 0      | 0      | 6      | 93     | 1      | 1      | 0      | 1    | 0      | 0      | 0      | 0      | 0      | 0      | 0      | 103   | 0.9029 |
|                     | Lake  | 0               | 0      | 0    | 0      | 0      | 0      | 0      | 82     | 11     | 0      | 0    | 0      | 0      | 2      | 0      | 0      | 0      | 0      | 95    | 0.8632 |
|                     | River | 0               | 0      | 0    | 0      | 0      | 0      | 0      | 0      | 304    | 2      | 0    | 3      | 2      | 1      | 1      | 1      | 0      | 12     | 326   | 0.9325 |
|                     | Crop  | 4               | 0      | 0    | 0      | 0      | 18     | 0      | 0      | 1      | 277    | 14   | 3      | 0      | 0      | 0      | 0      | 0      | 0      | 317   | 0.8738 |
|                     | OL    | 4               | 1      | 3    | 0      | 0      | 0      | 0      | 0      | 0      | 18     | 75   | 1      | 0      | 1      | 0      | 0      | 0      | 0      | 103   | 0.7282 |
|                     | Urban | 0               | 0      | 0    | 0      | 0      | 13     | 0      | 0      | 5      | 7      | 1    | 153    | 0      | 3      | 7      | 0      | 0      | 0      | 189   | 0.8095 |
|                     | UGS   | 0               | 0      | 0    | 0      | 0      | 2      | 0      | 0      | 0      | 2      | 0    | 0      | 19     | 0      | 0      | 0      | 0      | 0      | 23    | 0.8261 |
|                     | IAT   | 0               | 0      | 0    | 0      | 0      | 5      | 0      | 0      | 2      | 0      | 0    | 0      | 0      | 58     | 1      | 1      | 1      | 0      | 68    | 0.8529 |
|                     | DL    | 0               | 0      | 0    | 0      | 0      | 1      | 0      | 0      | 0      | 0      | 0    | 1      | 0      | 0      | 59     | 0      | 0      | 0      | 61    | 0.9672 |
|                     | BS    | 0               | 0      | 0    | 0      | 0      | 1      | 0      | 0      | 0      | 0      | 0    | 0      | 0      | 1      | 1      | 16     | 0      | 0      | 19    | 0.8421 |
|                     | BR    | 0               | 0      | 0    | 0      | 0      | 3      | 0      | 2      | 1      | 2      | 0    | 0      | 1      | 0      | 0      | 0      | 62     | 0      | 71    | 0.8732 |
|                     | Snow  | 1               | 0      | 0    | 0      | 0      | 0      | 2      | 0      | 1      | 2      | 3    | 2      | 0      | 0      | 2      | 0      | 0      | 83     | 96    | 0.8646 |
| Total               |       | 92              | 41     | 100  | 62     | 28     | 715    | 98     | 87     | 347    | 330    | 100  | 173    | 22     | 71     | 72     | 18     | 64     | 97     | 2517  |        |
| UA                  |       | 0.8043          | 0.8049 | 0.81 | 0.8387 | 0.8929 | 0.9161 | 0.9490 | 0.9425 | 0.8761 | 0.8394 | 0.75 | 0.8844 | 0.8636 | 0.8169 | 0.8194 | 0.8889 | 0.9688 | 0.8557 |       |        |
| OA                  |       | 0.8745          |        |      |        |        |        |        |        |        |        |      |        |        |        |        |        |        |        |       |        |
| Kappa               |       | 0.8551          |        |      |        |        |        |        |        |        |        |      |        |        |        |        |        |        |        |       |        |

**Table S6.** Confusion matrix of LULC second-degree classes accuracy assessment in 2020. The overall accuracy is 92.14% and the Kappa coefficient is 0.91. UA denotes user's accuracy, PA denotes producer's accuracy.

|                     |       | 2020 Prediction |        |       |     |       |        |        |        |        |       |        |        |        |        |        |      |       |        |        |        |
|---------------------|-------|-----------------|--------|-------|-----|-------|--------|--------|--------|--------|-------|--------|--------|--------|--------|--------|------|-------|--------|--------|--------|
| Second-Degree Class |       | BLF             | NLF    | MF    | BLS | NLS   | Grass  | Marsh  | Lake   | River  | Crop  | OL     | Urban  | UGS    | IAT    | DL     | BS   | BR    | Snow   | Total  | PA     |
| 2020 Reference      | BLF   | 72              | 3      | 1     | 0   | 0     | 0      | 0      | 0      | 0      | 0     | 2      | 0      | 2      | 0      | 0      | 0    | 0     | 0      | 80     | 0.9    |
|                     | NLF   | 0               | 44     | 4     | 0   | 0     | 0      | 0      | 0      | 0      | 0     | 0      | 0      | 1      | 0      | 0      | 0    | 0     | 0      | 49     | 0.898  |
|                     | MF    | 4               | 1      | 84    | 4   | 0     | 1      | 1      | 0      | 0      | 0     | 0      | 0      | 1      | 0      | 0      | 0    | 0     | 0      | 96     | 0.875  |
|                     | BLS   | 3               | 0      | 0     | 40  | 2     | 3      | 0      | 0      | 0      | 0     | 1      | 0      | 0      | 0      | 0      | 0    | 0     | 0      | 49     | 0.8163 |
|                     | NLS   | 0               | 0      | 1     | 2   | 21    | 1      | 0      | 0      | 0      | 0     | 1      | 0      | 0      | 0      | 0      | 0    | 0     | 0      | 26     | 0.8077 |
|                     | Grass | 2               | 0      | 0     | 4   | 1     | 644    | 11     | 0      | 1      | 5     | 1      | 6      | 1      | 1      | 1      | 1    | 1     | 1      | 681    | 0.9457 |
|                     | Marsh | 0               | 0      | 0     | 0   | 0     | 9      | 101    | 1      | 0      | 0     | 0      | 0      | 0      | 1      | 0      | 0    | 0     | 0      | 112    | 0.9018 |
|                     | Lake  | 0               | 0      | 0     | 0   | 0     | 0      | 0      | 51     | 2      | 1     | 0      | 0      | 0      | 0      | 0      | 0    | 0     | 0      | 54     | 0.9444 |
|                     | River | 0               | 0      | 0     | 0   | 0     | 2      | 0      | 1      | 349    | 0     | 0      | 1      | 0      | 5      | 0      | 0    | 0     | 0      | 358    | 0.9749 |
|                     | Crop  | 0               | 0      | 0     | 0   | 0     | 15     | 0      | 0      | 0      | 328   | 2      | 1      | 1      | 0      | 0      | 0    | 0     | 0      | 347    | 0.9452 |
|                     | OL    | 5               | 0      | 1     | 0   | 0     | 0      | 1      | 0      | 0      | 0     | 37     | 0      | 1      | 0      | 0      | 0    | 0     | 0      | 45     | 0.8222 |
|                     | Urban | 0               | 0      | 0     | 0   | 0     | 5      | 0      | 0      | 1      | 8     | 0      | 145    | 0      | 4      | 0      | 1    | 0     | 0      | 164    | 0.8841 |
|                     | UGS   | 0               | 0      | 1     | 0   | 0     | 1      | 0      | 0      | 0      | 3     | 2      | 0      | 23     | 0      | 0      | 0    | 0     | 0      | 30     | 0.7667 |
|                     | IAT   | 0               | 0      | 0     | 0   | 0     | 5      | 2      | 0      | 0      | 0     | 0      | 6      | 0      | 75     | 0      | 0    | 0     | 0      | 88     | 0.8523 |
|                     | DL    | 0               | 0      | 0     | 0   | 0     | 0      | 0      | 0      | 0      | 0     | 0      | 0      | 0      | 0      | 53     | 0    | 5     | 0      | 58     | 0.9138 |
|                     | BS    | 0               | 0      | 0     | 0   | 0     | 0      | 0      | 0      | 0      | 0     | 0      | 0      | 0      | 0      | 1      | 17   | 0     | 0      | 18     | 0.9444 |
|                     | BR    | 0               | 0      | 0     | 0   | 0     | 2      | 0      | 0      | 1      | 1     | 0      | 1      | 0      | 0      | 0      | 0    | 54    | 3      | 62     | 0.871  |
| Snow                | 0     | 0               | 0      | 0     | 0   | 2     | 0      | 1      | 0      | 0      | 0     | 0      | 0      | 0      | 1      | 1      | 2    | 41    | 48     | 0.8542 |        |
| Total               |       | 86              | 48     | 92    | 50  | 24    | 690    | 116    | 54     | 354    | 346   | 46     | 160    | 30     | 86     | 56     | 20   | 62    | 45     | 2365   |        |
| UA                  |       | 0.8372          | 0.9167 | 0.913 | 0.8 | 0.875 | 0.9333 | 0.8707 | 0.9444 | 0.9859 | 0.948 | 0.8043 | 0.9063 | 0.7667 | 0.8721 | 0.9464 | 0.85 | 0.871 | 0.9111 |        |        |
| OA                  |       | 0.9214          |        |       |     |       |        |        |        |        |       |        |        |        |        |        |      |       |        |        |        |
| Kappa               |       | 0.9082          |        |       |     |       |        |        |        |        |       |        |        |        |        |        |      |       |        |        |        |

**Table S7.** Transition matrix of LULC first-degree classes in 2018-2020.

| First-Degree Class<br>Transition Matrix |                           | 2020    |           |           |                           |                      |                      |         |                 |           |
|-----------------------------------------|---------------------------|---------|-----------|-----------|---------------------------|----------------------|----------------------|---------|-----------------|-----------|
|                                         |                           | Forest  | Shrubland | Grassland | Wetland and<br>Water body | Agricultural<br>land | Construction<br>land | Barren  | Snow<br>and ice | Total2018 |
| 2018                                    | Forest                    | 4427.58 | 125.32    | 170.48    | 111.21                    | 134.24               | 80.59                | 133.70  | 69.64           | 5252.76   |
|                                         | Shrubland                 | 341.98  | 4911.60   | 326.84    | 128.23                    | 291.73               | 191.43               | 240.38  | 154.29          | 6586.48   |
|                                         | Grassland                 | 405.95  | 451.13    | 148317.88 | 217.51                    | 197.84               | 294.43               | 395.91  | 62.49           | 150343.14 |
|                                         | Wetland and<br>Water body | 137.74  | 192.51    | 225.62    | 10742.13                  | 222.90               | 204.65               | 201.36  | 199.92          | 12126.84  |
|                                         | Agricultural land         | 138.49  | 226.37    | 426.84    | 207.75                    | 4568.56              | 402.94               | 191.06  | 85.06           | 6247.07   |
|                                         | Construction land         | 56.14   | 196.26    | 182.44    | 150.71                    | 270.94               | 4547.81              | 251.17  | 94.96           | 5750.42   |
|                                         | Barren                    | 142.01  | 266.11    | 425.93    | 98.25                     | 320.94               | 202.19               | 6093.65 | 392.64          | 7941.73   |
|                                         | Snow and ice              | 22.00   | 36.80     | 287.64    | 72.24                     | 179.54               | 126.33               | 414.37  | 3913.14         | 5052.07   |
| Total2020                               |                           | 5671.89 | 6406.12   | 150363.67 | 11728.04                  | 6186.69              | 6050.36              | 7921.60 | 4972.15         | 199300.51 |

**Table S8.** Transition matrix of LULC second-degree classes in 2018-2020.

| Second-Degree Class<br>Transition Matrix |       | 2020           |                |                |                |                |                  |                |                |                |                |               |                |               |                |                |               |                |                | Total<br>2018    |
|------------------------------------------|-------|----------------|----------------|----------------|----------------|----------------|------------------|----------------|----------------|----------------|----------------|---------------|----------------|---------------|----------------|----------------|---------------|----------------|----------------|------------------|
|                                          |       | BLF            | NLF            | MF             | BLS            | NLS            | Grass            | Marsh          | Lake           | River          | Crop           | OL            | Urban          | UGS           | IAT            | DL             | BS            | BR             | Snow           |                  |
| 2018                                     | BLF   | <b>1687.61</b> | 11.20          | 59.45          | 37.34          | 10.58          | 70.49            | 30.92          | 0.49           | 11.40          | 33.68          | 0.19          | 12.86          | 10.46         | 8.57           | 30.95          | 11.97         | 30.39          | 24.35          | <b>2082.89</b>   |
|                                          | NLF   | 49.68          | <b>1456.62</b> | 31.50          | 12.43          | 15.35          | 48.68            | 21.70          | 6.43           | 11.23          | 64.47          | 0.02          | 6.90           | 13.52         | 7.20           | 6.30           | 3.55          | 12.36          | 36.91          | <b>1804.87</b>   |
|                                          | MF    | 37.20          | 6.68           | <b>1087.62</b> | 22.35          | 27.27          | 51.32            | 12.49          | 2.16           | 14.39          | 34.69          | 1.19          | 1.93           | 17.96         | 1.19           | 5.27           | 11.03         | 21.88          | 8.38           | <b>1365.01</b>   |
|                                          | BLS   | 117.76         | 60.09          | 11.28          | <b>3523.83</b> | 130.28         | <b>309.08</b>    | 68.13          | 5.02           | 24.06          | 177.40         | 11.72         | 38.09          | 6.22          | 52.10          | 75.68          | 33.65         | 56.38          | 121.51         | <b>4822.28</b>   |
|                                          | NLS   | 10.03          | 121.80         | 21.02          | 129.06         | <b>1128.44</b> | 17.75            | 11.01          | 7.00           | 13.01          | 79.43          | 23.18         | 21.00          | 31.00         | 43.02          | 11.38          | 25.69         | 37.61          | 32.78          | <b>1764.21</b>   |
|                                          | Grass | 267.91         | 76.83          | 61.22          | 344.68         | 106.45         | <b>148317.88</b> | 105.69         | 40.64          | 71.18          | 161.27         | 36.57         | 267.45         | 5.62          | 21.37          | 191.16         | 10.86         | 193.89         | 62.49          | <b>150343.14</b> |
|                                          | Marsh | 29.53          | 6.00           | 46.29          | 66.92          | 51.19          | <b>205.11</b>    | <b>5572.09</b> | 12.47          | <b>27.47</b>   | 145.53         | 7.75          | 130.77         | 0.43          | 3.11           | 73.12          | 23.00         | 11.51          | 8.78           | <b>6421.06</b>   |
|                                          | Lake  | 6.01           | 5.01           | 9.39           | 21.01          | 13.01          | 12.80            | 20.30          | <b>2908.39</b> | 24.83          | 36.78          | 3.06          | 12.06          | 0.14          | 44.62          | 0.67           | 20.22         | 10.39          | 153.92         | <b>3302.61</b>   |
|                                          | River | 3.08           | 6.06           | 26.37          | 22.35          | 18.04          | 7.71             | 14.45          | 1.27           | <b>2160.86</b> | 28.66          | 1.13          | 7.10           | 0.14          | 6.28           | 2.97           | 11.53         | 47.95          | 37.22          | <b>2403.17</b>   |
|                                          | Crop  | 94.47          | 24.66          | 1.76           | 125.51         | 89.14          | <b>412.54</b>    | 68.53          | 78.27          | 19.70          | <b>4440.89</b> | 9.19          | <b>147.60</b>  | 94.93         | 144.09         | 127.17         | 44.00         | 11.55          | 85.06          | <b>6019.07</b>   |
|                                          | OL    | 16.82          | 0.02           | 0.77           | 3.04           | 8.67           | 14.30            | 31.19          | 5.00           | 5.06           | 4.35           | <b>114.13</b> | 3.41           | 6.76          | 6.15           | 7.00           | 1.33          |                |                | <b>228.00</b>    |
|                                          | Urban | 5.59           | 5.00           | 8.11           | 38.68          | 76.34          | 51.89            | 2.79           | 6.62           | 23.92          | 223.83         | 3.46          | <b>2328.14</b> | 0.89          | 84.16          | 92.39          | 4.70          | 13.64          | 48.86          | <b>3019.00</b>   |
|                                          | UGS   | 11.34          | 12.00          | 13.14          | 42.00          | 27.01          | 56.71            | 41.91          | 0.14           | 7.15           | 3.29           | 1.60          | 1.30           | <b>40.23</b>  | 0.05           |                |               | 28.90          |                | <b>286.79</b>    |
|                                          | IAT   | 0.49           | 0.02           | 0.43           | 7.12           | 5.12           | 73.83            | 55.09          | 3.52           | 9.57           | 38.37          | 0.40          | 120.49         | 0.50          | <b>1972.04</b> | 30.75          | 11.62         | 69.16          | 46.10          | <b>2444.62</b>   |
|                                          | DL    | 58.01          | 34.07          | 9.11           | 144.75         | 77.04          | <b>302.02</b>    | 9.32           | 5.73           | 22.81          | 174.38         | 0.04          | 85.09          |               | 36.79          | <b>563.77</b>  | 180.45        | 153.62         | 14.05          | <b>1871.03</b>   |
|                                          | BS    |                |                | 1.01           | 0.48           |                | 45.08            | 12.26          | 1.78           | 11.73          | 112.07         |               | 34.15          |               | 9.93           | 7.13           | <b>204.72</b> | 10.91          | 76.90          | <b>528.15</b>    |
|                                          | BR    | 13.34          | 12.06          | 14.41          | 14.85          | 29.00          | 78.82            | 7.08           | 4.56           | 22.97          | 34.46          | 0.00          | 14.91          |               | 21.32          | 343.18         | 189.46        | <b>4440.42</b> | 301.69         | <b>5542.55</b>   |
|                                          | Snow  | 11.22          | 2.01           | 8.78           | 28.32          | 8.48           | <b>287.64</b>    | 23.80          | 31.96          | 16.47          | 172.94         | 6.61          | 84.90          |               | 41.43          | 3.41           | 19.78         | 391.18         | <b>3913.14</b> | <b>5052.07</b>   |
| Total 2020                               |       | <b>2420.11</b> | <b>1840.14</b> | <b>1411.65</b> | <b>4584.71</b> | <b>1821.41</b> | <b>150363.67</b> | <b>6108.76</b> | <b>3121.44</b> | <b>2497.83</b> | <b>5966.46</b> | <b>220.23</b> | <b>3318.15</b> | <b>228.80</b> | <b>2503.41</b> | <b>1572.28</b> | <b>807.57</b> | <b>5541.75</b> | <b>4972.15</b> | <b>199300.51</b> |

**Table S9.** Accuracy comparison (%) of the LULC classification result obtained in this study with the FROM-GLC10 (2017) land cover products in 2018. Same validation points were used to assess the accuracies.

| LULC Types                | 2018 LULC Product |       | FROM-GLC10 |       |
|---------------------------|-------------------|-------|------------|-------|
|                           | PA(%)             | UA(%) | PA(%)      | UA(%) |
| Forest                    | 91.59             | 87.34 | 84.96      | 80.33 |
| Shrubland                 | 75.27             | 81.39 | 33.33      | 38.75 |
| Grassland                 | 92.02             | 90.53 | 88.72      | 85.66 |
| Wetland (Marsh)           | 90.29             | 94.90 | 63.11      | 54.17 |
| Water Body (River & Lake) | 96.44             | 97.36 | 96.20      | 95.29 |
| Agricultural land         | 90.00             | 88.94 | 80.24      | 85.75 |
| Construction land         | 81.79             | 86.09 | 76.79      | 83.66 |
| Barren                    | 88.74             | 88.16 | 84.77      | 81.01 |
| Snow and ice              | 93.75             | 92.78 | 86.46      | 90.22 |
| <b>OA(%)</b>              | 90.43             |       | 83.47      |       |
| <b>Kappa Coefficient</b>  | 0.89              |       | 0.81       |       |

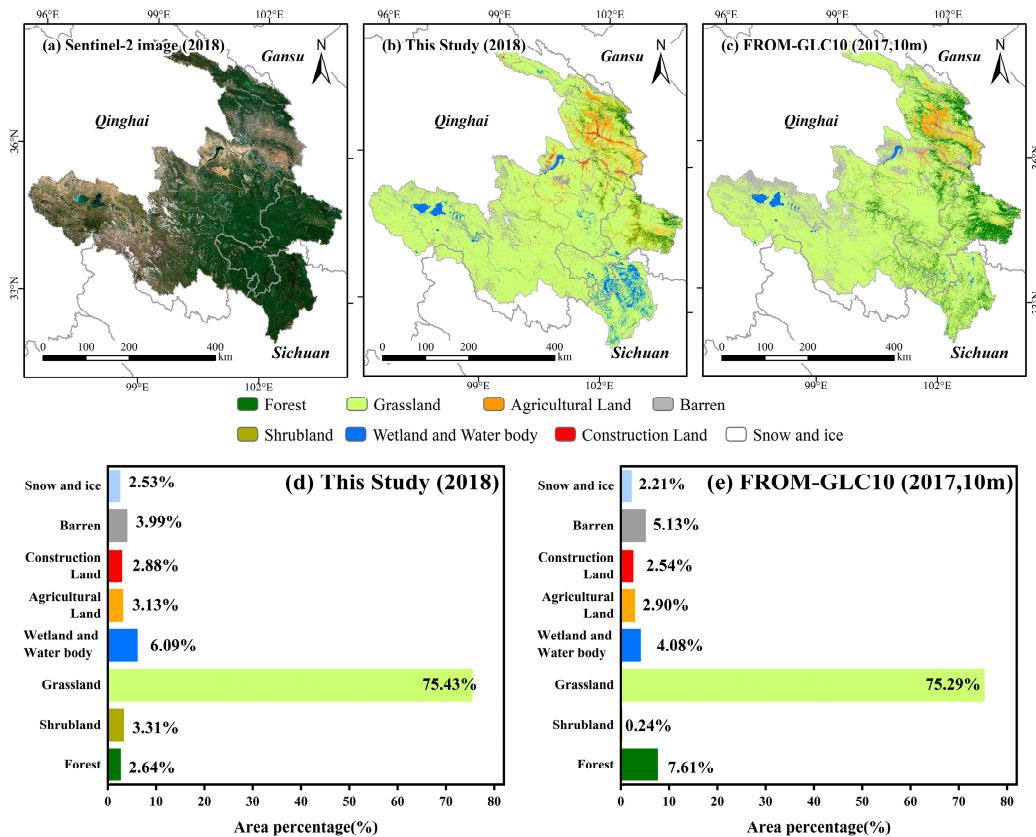

**Figure S1.** Ratios (%) of different LULC types areas between this study and FROM-GLC10.

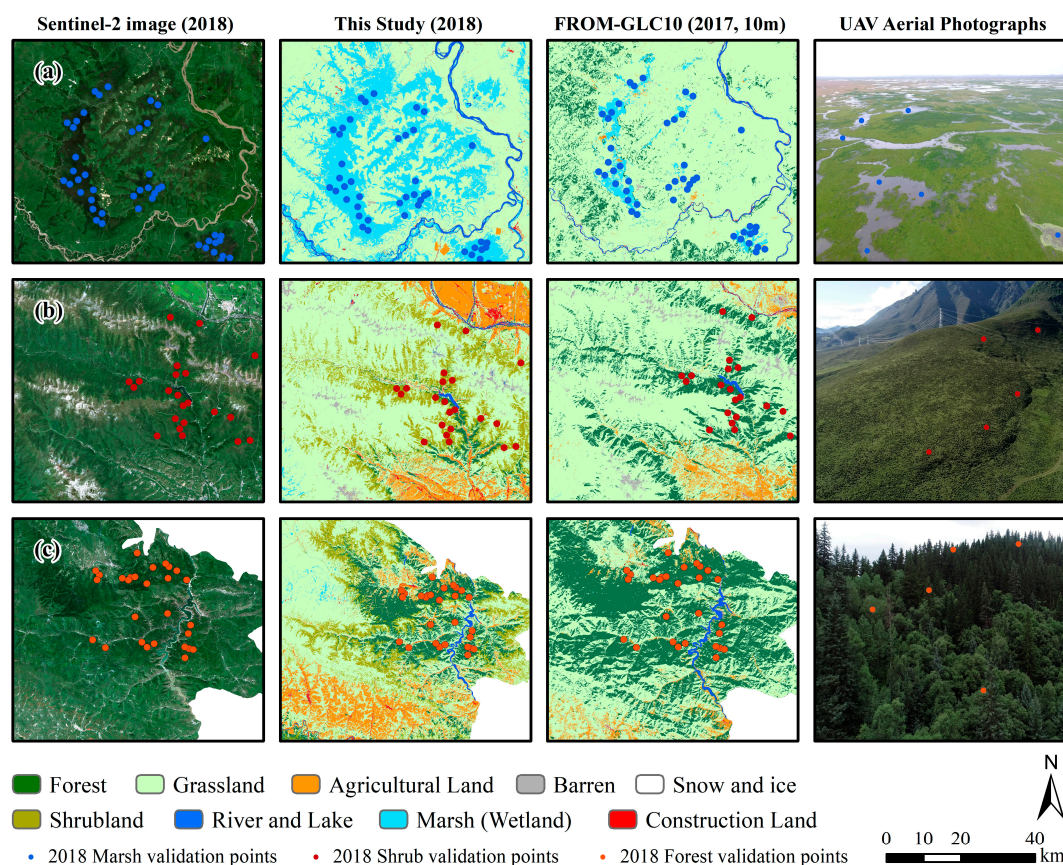

**Figure S2.** Visual comparison and assessment of this study with Sentinel-2 RGB, FROM-GLC10 products and UAV aerial photographs. Three typical areas were selected for close-ups (a: comparison and validation of marsh (wetland) area, b: comparison and validation of shrub area, c: comparison and validation of forest area).

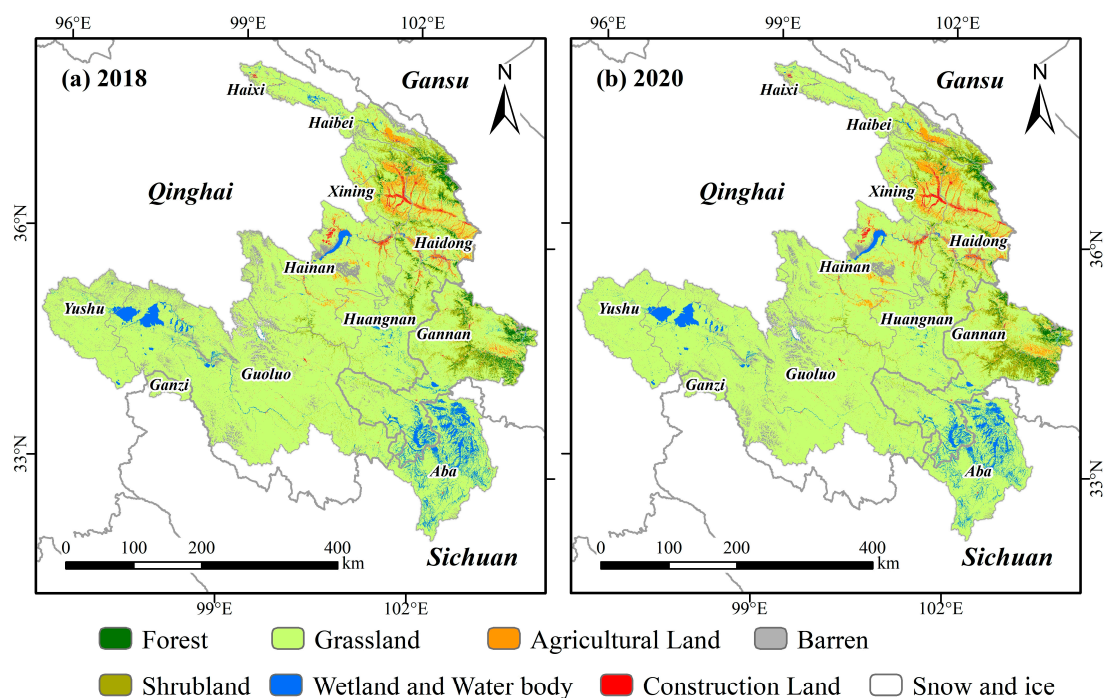

**Figure S3.** Spatial distribution of LULC first-degree classes in the study area in 2018 (a) and 2020 (b).

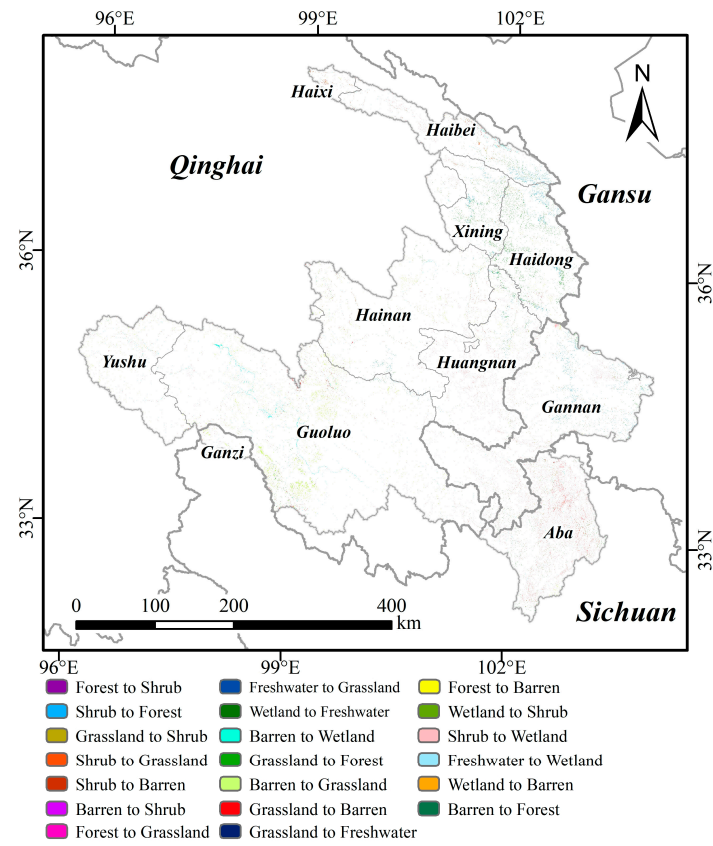

**Figure S4.** The map of changes in ecosystem types based on LULC types.
